# Supplementary material
Source: publisher figshare collection journal article supplement (https://acs.figshare.com/ndownloader/files/13804394)
Supplement: Supplementary file 1 [file 13804394]

## Supporting information

# Reducing the gap between the activation energy measured in the liquid and the glassy states by adding a plasticizer to polylactide

*Steven Araujo<sup>1</sup>, Nicolas Delpouve<sup>1\*</sup>, Alexandre Dhotel<sup>1</sup>, Sandra Domenek<sup>2</sup>, Alain Guinault<sup>3</sup>, Laurent Delbreilh<sup>1</sup> and Eric Dargent<sup>1</sup>*

<sup>1</sup>Normandie Univ, UNIROUEN Normandie, INSA Rouen, CNRS, Groupe de Physique des Matériaux, 76000 Rouen, France

<sup>2</sup>UMR Ingénierie Procédés Aliments, AgroParisTech, INRA, Université Paris-Saclay, 1 avenue des Olympiades, F-91300 Massy, France

<sup>3</sup>PIMM, CNAM, CNRS UMR 8006, Arts et Métiers-ParisTech, 151 bd de l'Hôpital, 75013 Paris, France

\* Correspondence: nicolas.delpouve1@univ-rouen.fr; Tel.: +33-(0)232955165

# Contents

|                                                        |    |
|--------------------------------------------------------|----|
| Procedure to extract $\beta_{KWW}$                     | S3 |
| TSDC results with varying the polarization temperature | S4 |

## Procedure to extract $\beta_{KWW}$

$\beta_{KWW}$  is extracted from the fitting of the relaxation function (see Figure S1).  
First the relaxation time distribution is given by:

$$f(\tau) = \frac{1}{\pi} \frac{\left(\frac{\tau}{\tau_{HN}}\right)^{\beta_{HN}\alpha_{HN}} \sin(\beta_{HN}\vartheta)}{\left[\left(\frac{\tau}{\tau_{HN}}\right)^{2\alpha_{HN}} + 2\left(\frac{\tau}{\tau_{HN}}\right)^{\alpha_{HN}} \cos(\pi\alpha_{HN}) + 1\right]^{\frac{\beta_{HN}}{2}}}$$

Where

$$\vartheta = \text{Arc tan}\left(\frac{\sin(\pi\alpha_{HN})}{\left(\frac{\tau}{\tau_{HN}}\right)^{\alpha_{HN}} + \cos(\pi\alpha_{HN})}\right) \quad \text{for the positive argument of arc tan.}$$

$$\vartheta = \text{Arc tan}\left(\frac{\sin(\pi\alpha_{HN})}{\left(\frac{\tau}{\tau_{HN}}\right)^{\alpha_{HN}} + \cos(\pi\alpha_{HN})}\right) + \pi \quad \text{for the negative argument of arc tan.}$$

Then the relaxation function is obtained from the integration of the function of relaxation times distribution according to:

$$\varphi(t) = \int_0^{\infty} f(\tau) e^{-\frac{t}{\tau}} d\tau$$

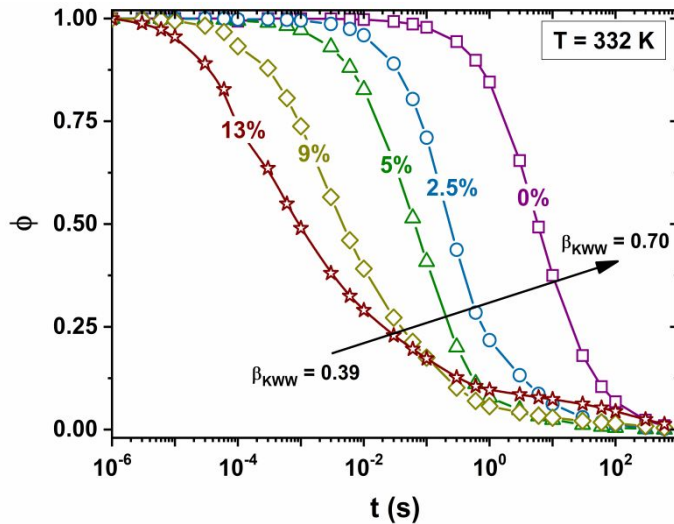

**Figure S1:** Function of relaxation for neat and plasticized polylactides

The data have been fitted with the Kohlrausch-Williams-Watts equation:

$$\phi_{\beta}(t) = \exp[-(t/\tau)^{\beta}]$$

With  $\beta$  being  $\beta_{KWW}$

## TSDC results with varying the polarization temperature

The temperature of polarization was chosen to both observe the global response of the material (well-resolved peak) and also to get rid of parasite signatures that become more prominent with the increase of plasticizer content. As shown in Figure S2, several polarization temperatures have been tested for each material and the one for which an acceptable compromise was found has been chosen.

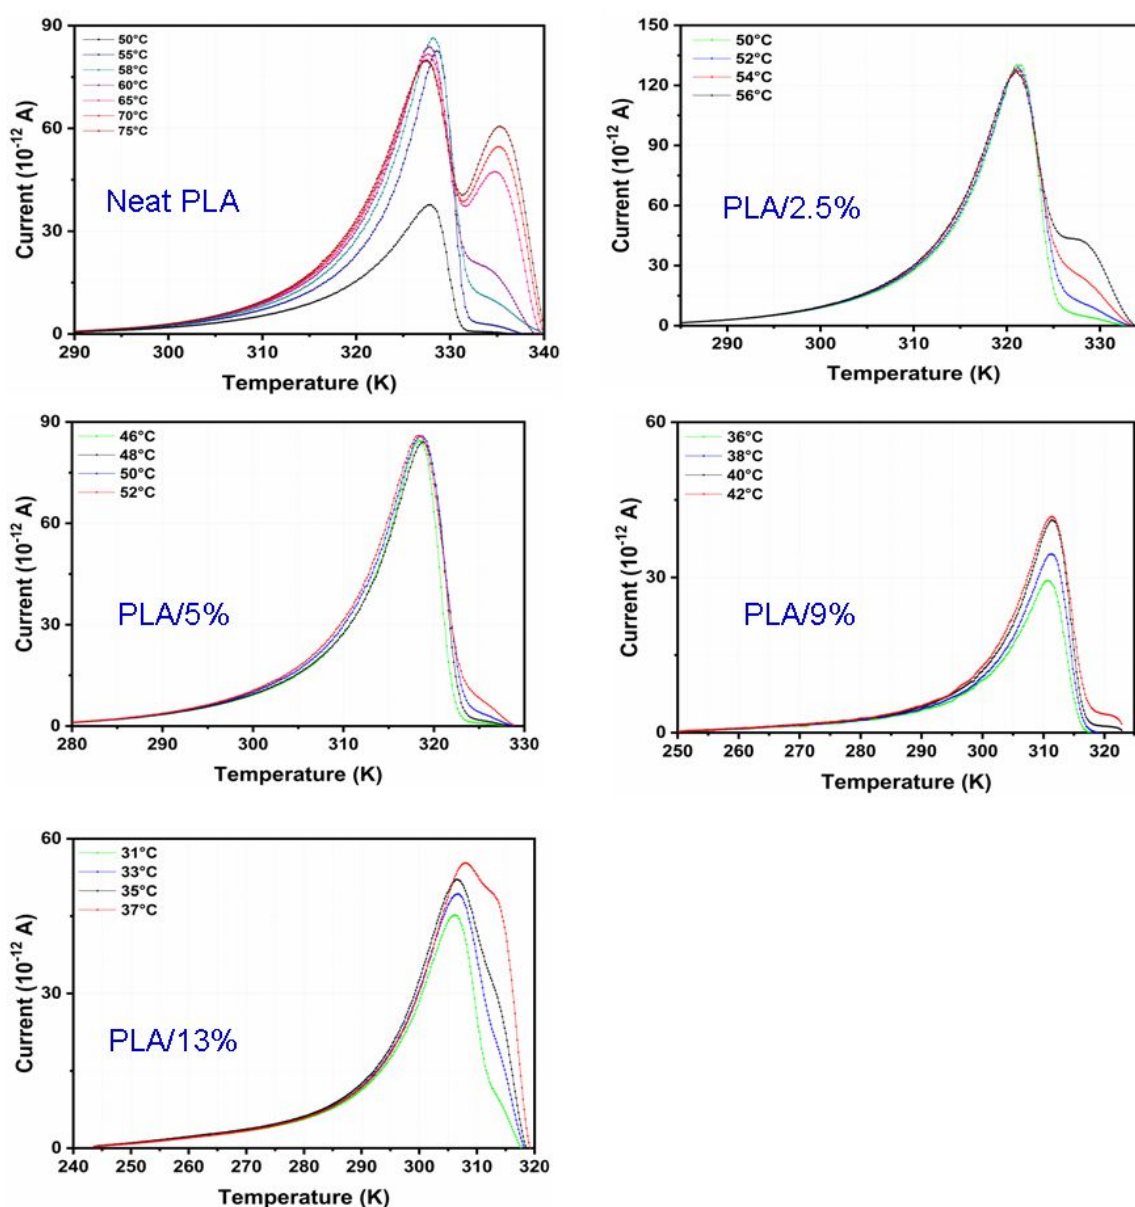

**Figure S2:** Recorded depolarization current as a function of temperature for several polarization temperatures.
